# Supplementary material for: Fc-independent functions of anti-CTLA-4 antibodies contribute to anti-tumor efficacy
Source: Cancer Immunol Immunother. 2022 Mar 3;71(10):2421–31. doi: 10.1007/s00262-022-03170-z (PMC9463231; doi:10.1007/s00262-022-03170-z)
Supplement: Supplementary file 1 — Supplementary file1 (PDF 1148 kb) [file 262_2022_3170_MOESM1_ESM.pdf]

**a**

Anti-mCTLA-4 VHH (H11)

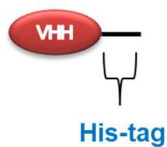

His tag: highlighted in blue

Signal Sequence: highlighted in red

**MKYLLPTAAAGLLLLAAQPAMA**QVQLVESGGGLAQP  
 GGSRLRLSCAASGSTISSVAVGWYRQTPGNQREWVA  
 TSSTSSTTATYADSVKGRFTISRDNKNTIYLQMNSL  
 KPEDTAVYYCKTGLTNWGRGTQVTVSSAAAH**HHHHH**  
**HHHHH**

Molecular weight: 13.6 kDa

**b**

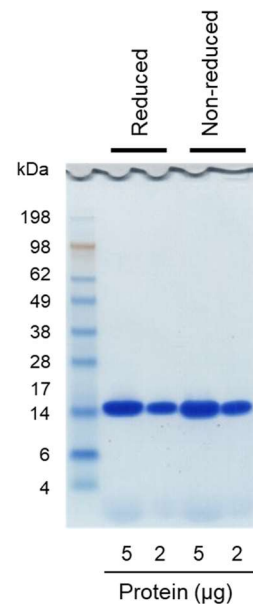

**c**

Anti-mCTLA-4 VHH (H11)

Anti-serum albumin VHH

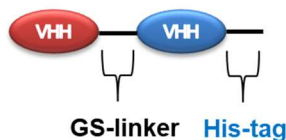

His tag: highlighted in blue

Signal Sequence: highlighted in red

Linker: highlighted in purple

**METD**LLLL**WV**LLLL**WVPGSTG**QVQLVESGGGLAQP**GGSL**  
 RLSCAASGSTISSVAVGWYRQTPGNQREW**VATSSTSSTT**  
 ATYADSVKGRFTISRDNKNTIYLQMNSLKPEDTAVYYCK  
 TGLTNWGRGTQVTVSS**GGSGGSGGSGGSGGSGGSGG**  
**SG**AVQLVESGGGLVQPGNSRLRLSCAASGFTFRSFGMSW  
 VRQAPGKEPEWVSSISGSGSDTLYADSVKGRFTISRDNK  
 KTTLYLQMNSLKPEDTAVYYCTIGGSLSRSSQGTQVTVS  
 SAAAH**HHHHHHHHHHH**

Molecular weight: 27.2 kDa

**d**

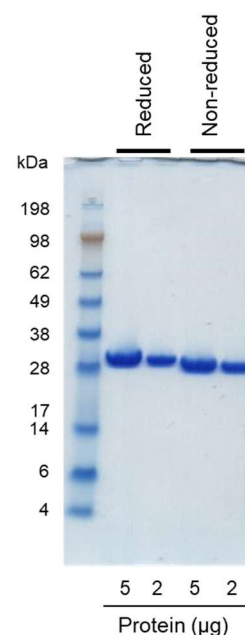

**Supplementary Fig. 1** Generation of anti-mouse CTLA-4 VHH (H11) and half-life extended H11 linked to anti-serum albumin VHH (H11-HLE). Amino acid sequence and SDS-PAGE of H11 (**a** and **b**) and H11-HLE (**c** and **d**)

**a**

Signal Sequence: highlighted in **red**

**Ipilimumab mIgG2a heavy chain**

**MGWSCILFLVATATGVHS**QVQLVESGGGVVQPGRSLRLSCAAS  
GFTFSSYTMHWVRQAPGKGLEWVTFISYDGNNKYADSVKGRF  
TISRDNKNTLYLQMNSLRAEDTAIYYCARTGWLGPFDYWGGQT  
LVTVSSAKTTAPSVYPLAPVCGDTTGSSVTLGCLVKGYFPEPVT  
LWNSSGLSSGVHTFPAVLQSDLYTLSSSVTVTSSTWPSQSITCNV  
AHPASSTKVDDKIEPRGPTIKPCPPCKCPAPNLLGGPSVFIFPPKI  
KDVLMISLSPIVTCVVVDVSEDDPDVQISWVFNNEVHTAQQT  
REDYNSTLRVVSALPIQHQQDWMSGKEFKCKVNNKDLPAPIERTI  
SKPKGSVRAPQVYVLPPEEEEMTKKQVTLTCMVTDFMPEDIYVE  
WTNNGKTELNYKNTEPVLDSGYSYFMYSKLRVEKKNWVERNSY  
SCSVVHEGLHNHHTTKSFSRTPGK

**Ipilimumab mIgG2a light chain**

**MGWSCILFLVATATGVHS**EIVLTQSPGTLSSLSPGERATLSCRASQ  
SVGSSYLAWYQQKPGQAPRLIYGAFSRATGIPDRFSGSGSGTD  
FTLTISRLEPEDFAVYYCQQYGSSPWTFTGQGTKEIKRADAAPT  
SIFPPSSEQLTSGGASVVCFLNNFYPKDINVKWKIDGSRQNGVL  
NSWTDQDSKDYSTYSMSSTLTLTDEYERHNSYTCEATHKTSTSPI  
VKSFNRNEC

Molecular weight: 146 kDa

**b**

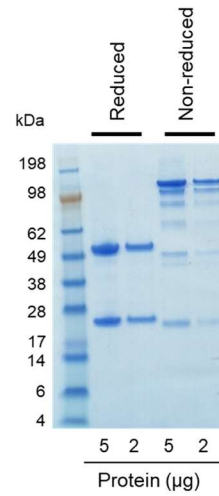

**c**

Signal Sequence: highlighted in **red**

Mutation in Fc region: highlighted in **blue**

**Ipilimumab mIgG2a L234A\_L235A\_P329G heavy chain**

**MGWSCILFLVATATGVHS**QVQLVESGGGVVQPGRSLRLSCAAS  
GFTFSSYTMHWVRQAPGKGLEWVTFISYDGNNKYADSVKGRF  
TISRDNKNTLYLQMNSLRAEDTAIYYCARTGWLGPFDYWGGQT  
LVTVSSAKTTAPSVYPLAPVCGDTTGSSVTLGCLVKGYFPEPVT  
LWNSSGLSSGVHTFPAVLQSDLYTLSSSVTVTSSTWPSQSITCNV  
AHPASSTKVDDKIEPRGPTIKPCPPCKCPAPN**AA**GGPSVFIFPPKI  
KDVLMISLSPIVTCVVVDVSEDDPDVQISWVFNNEVHTAQQT  
REDYNSTLRVVSALPIQHQQDWMSGKEFKCKVNNKDL**G**APIERTI  
SKPKGSVRAPQVYVLPPEEEEMTKKQVTLTCMVTDFMPEDIYVE  
WTNNGKTELNYKNTEPVLDSGYSYFMYSKLRVEKKNWVERNSY  
SCSVVHEGLHNHHTTKSFSRTPGK

**Ipilimumab mIgG2a L234A\_L235A\_P329G light chain**

**MGWSCILFLVATATGVHS**EIVLTQSPGTLSSLSPGERATLSCRASQ  
SVGSSYLAWYQQKPGQAPRLIYGAFSRATGIPDRFSGSGSGTD  
FTLTISRLEPEDFAVYYCQQYGSSPWTFTGQGTKEIKRADAAPT  
SIFPPSSEQLTSGGASVVCFLNNFYPKDINVKWKIDGSRQNGVL  
NSWTDQDSKDYSTYSMSSTLTLTDEYERHNSYTCEATHKTSTSPI  
VKSFNRNEC

Molecular weight: 146 kDa

**d**

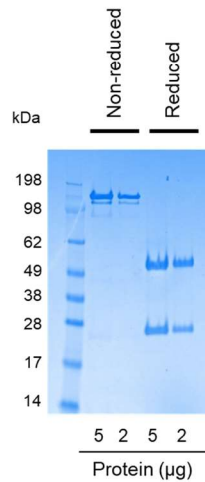

**Supplementary Fig. 2** Generation of Ipilimumab mIgG2a (Ipi-WT) and Ipilimumab mIgG2a LALAPG (Ipi-LALAPG). Amino acid sequence and SDS-PAGE of Ipi-WT (**a** and **b**) and Ipi-LALAPG (**c** and **d**)

## Mouse genomic locus

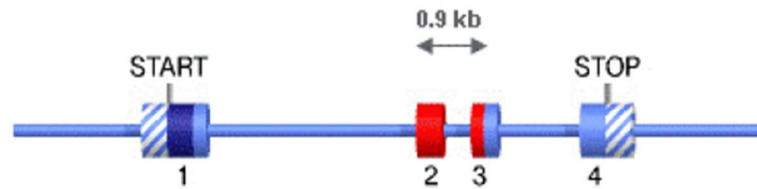

## Targeting vector

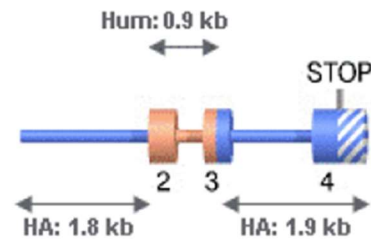

## Humanized allele (after CRISPR/Cas9-mediated gene editing)

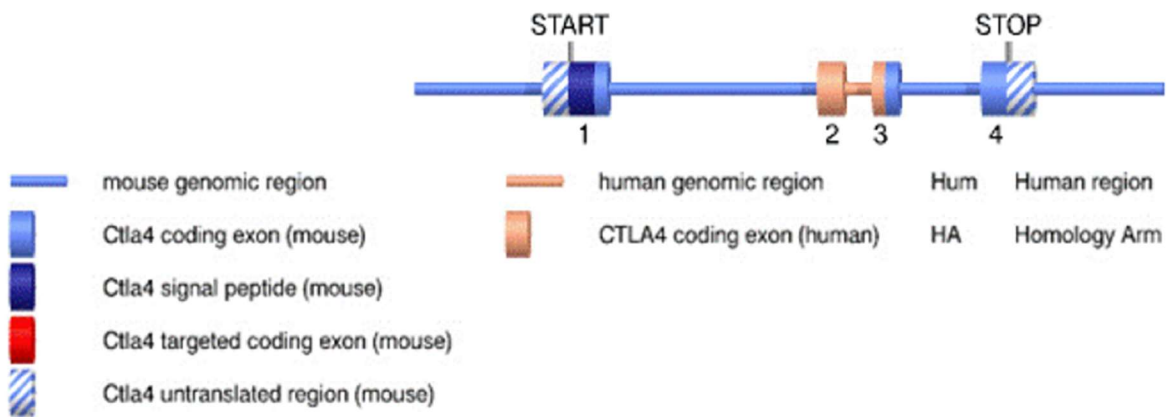

**Supplementary Fig. 3** Humanization of the Ctla4 gene via CRISPR/Cas9-mediated gene editing. The targeting construct replaced the exons coding for the extracellular (exon 2) and part of transmembrane (exon 3) domains of murine CTLA-4 with those of human CTLA-4.
